# Supplementary material for: One-Year Results of a Community-Based Translation of the Diabetes Prevention Program
Source: Oxford University Press journal article supplement (doi:10.2337/dc10-2115), 2011-05-19
Supplement: dc102115supplementarydata.pdf [file dc102115supplementarydata.pdf]

SUPPLEMENTARY DATA

**Supplementary Table 1. Adverse events and diabetes incidence across treatment conditions.**

|                           | Lifestyle<br>Weight Loss | Usual Care | P value |
|---------------------------|--------------------------|------------|---------|
| Adverse Events            |                          |            |         |
| Month 6                   | 7                        | 13         | 0.21    |
| Month 12                  | 11                       | 15         | 0.46    |
| Serious Adverse<br>Events |                          |            |         |
| Month 6                   | 3                        | 5          | 0.51    |
| Month 12                  | 5                        | 5          | 0.98    |
| Diabetes*                 |                          |            |         |
| Month 6                   | 2                        | 5          | 0.29    |
| Month 12                  | 2                        | 7          | 0.12    |

\*Fasting glucose > 126 or using diabetes medications at visit
